# Supplementary material for: Prospective validation in epithelial tumors of a gene expression predictor of liver metastasis derived from uveal melanoma
Source: PubMed Central journal article supplement (PMC6868129; doi:10.1038/s41598-019-52841-y), 2019-11-20
Supplement: 41598_2019_52841_MOESM1_ESM.pdf [file 41598_2019_52841_MOESM1_ESM.pdf]

1 Prospective validation in epithelial tumors of a gene expression  
2 predictor of liver metastasis derived from uveal melanoma.

3 Petros Tsantoulis,<sup>1,2,3\*</sup> Mauro Delorenzi,<sup>3,4,5</sup> Ivan Bièche,<sup>6</sup> Sophie Vacher,<sup>6</sup> Pascale  
4 Mariani,<sup>7</sup> Nathalie Cassoux,<sup>7</sup> Alexandre Houy,<sup>6,8</sup> Marc-Henri Stern,<sup>6,8</sup> Sergio Roman-  
5 Roman,<sup>9</sup> Pierre-Yves Dietrich,<sup>1,2</sup> Arnaud Roth,<sup>1,2</sup> Wulfran Cacheux<sup>10,1,6</sup>

- 6 1. Hôpitaux Universitaires de Genève, Service d'Oncologie, Geneva, Switzerland  
7 2. University of Geneva, Geneva, Switzerland  
8 3. SIB Swiss Institute of Bioinformatics, Bioinformatics Core Facility, Lausanne,  
9 Switzerland  
10 4. University Lausanne, Department of Fundamental Oncology, Lausanne, Switzerland  
11 5. Ludwig Institute for Cancer Research, Epalinges, Switzerland  
12 6. Institut Curie, Département de génétique, Paris, France  
13 7. Institut Curie, Département de chirurgie, Paris, France  
14 8. Institut Curie, PSL Research University, INSERM U830, Paris, France  
15 9. Institut Curie, PSL Research University, Translational Research Department, Paris,  
16 France  
17 10. Hôpital Privé – Pays de Savoie, Oncology department, Annemasse, France  
18

19

## 20 Supplementary methods

### 21 1. Processing of array expression data

22 Both processed and raw data, when available, were imported from the GEO and  
23 ArrayExpress. Raw Affymetrix data were treated with the RMA algorithm from the “affy”  
24 BioConductor (v3.4) package using the default settings (1).

25 Scaling of different datasets was performed with the scale() function from base R to a mean  
26 of zero and a variance of one. This was done in order to make distributions from different  
27 technologies (microarray, RNAseq) comparable, so that a single score equation can be used  
28 across datasets without modification. Otherwise the coefficients of the gene score would  
29 have to be re-calculated (and validated) separately for each dataset.

### 30 2. Molecular classes

31 Based on the molecular classification of uveal melanoma into two classes by Onken *et al.*  
32 (2), we used their published list of 60 class-specific genes to assign the most likely class to  
33 each tumor. The distribution of the difference between the means of the expression of class  
34 1 and the mean of class 2 genes, was clearly bimodal (supplementary figure 7) and was used  
35 to classify the tumors into the two classes. Visual inspection of the gene expression  
36 heatmap (supplementary figure 8) further supported this classification.

### 37 3. Univariable and bivariable survival models

38 For the purposes of the meta-analysis in uveal melanoma, the Cox survival models were  
39 specified as follows:

40 Univariable:  $\text{coxph}(\text{Surv}(\text{interval}, \text{event}) \sim \text{exp}[x,])$

41 Bivariable:  $\text{coxph}(\text{Surv}(\text{interval}, \text{event}) \sim \text{chr3} + \text{exp}[x,])$

42 where chr3 is a factor (categorical variable) with two levels (loss/no loss) and  $\text{exp}[x,]$  is the  
43 standardized expression of gene x, within each dataset.

### 44 4. Consensus Molecular Subtypes (CMS) of colorectal cancer

45 The molecular classification of colorectal cancer has been published previously(3) and an  
46 open-source reference classifier is available.<sup>1</sup> This classifier was used to classify PETACC and  
47 GSE14095 data based on both the RandomForest and SSP methods. Whenever the  
48 RandomForest failed to assign a CMS class, the SSP algorithm was used. The proportion of  
49 CMS groups was similar to previously published results.

### 50 5. Derivation of a prognostic linear model

51 The pooled data of the model-fitting dataset (training, N=196 patients) were used to train a  
52 prognostic model with the penalized likelihood algorithm of the GLMnet package (coxnet  
53 method). The following parameters were used for the derivation of a linear predictor:  
54 nfolds=16, to increase the number of cross-validation folds, and maxit=200000, to increase  
55 the iterations that are allowed until convergence can be achieved. The random generator

---

<sup>1</sup> <https://github.com/Sage-Bionetworks/CMSclassifier>

56 seed was fixed in order to ensure reproducibility. To improve the chances of convergence  
57 on a parsimonious model, the algorithm was applied only on candidate genes, which were  
58 associated with survival after adjustment for chromosome 3 status at FDR<0.1 in the meta-  
59 analysis (N=119, S. Table 2).

60 The linear predictor was trained to correlate with the risk of relapse. The predictor is a  
61 linear combination of two variables p and j, corresponding to the standardized expression of  
62 *PTP4A3* and *JPH* respectively. The score S is calculated with the following formula:

$$63 \quad S = 0.249 * p + 0.147 * j$$

64

65 The resulting values are mean-centered and standardized within each dataset.

66 In order to verify the robustness of the model-generating procedure, we also performed  
67 100 consecutive runs without fixing the random number generator seed. Genes *PTP4A3* and  
68 *JPH1* were included in all the resulting predictive models.

69

## 70 [References](#)

- 71 1. Irizarry RA, Bolstad BM, Collin F, Cope LM, Hobbs B, Speed TP. Summaries of  
72 Affymetrix GeneChip probe level data. *Nucleic Acids Res.* 2003 Feb;31(4):e15.
- 73 2. Onken MD, Worley LA, Ehlers JP, Harbour JW. Gene expression profiling in uveal  
74 melanoma reveals two molecular classes and predicts metastatic death. *Cancer Res.*  
75 2004 Oct;64(20):7205–9.
- 76 3. Guinney J, Dienstmann R, Wang X, de Reyniès A, Schlicker A, Soneson C, et al. The  
77 consensus molecular subtypes of colorectal cancer. *Nat Med.* 2015 Oct;21(11):1350–  
78 6.

79

80 Figure S1

81 **Kaplan-Meier plot of subgroups from figure 1B.** The differences between a-vs-b and a-vs-c  
82 are significant (Cox regression, P-values shown below).

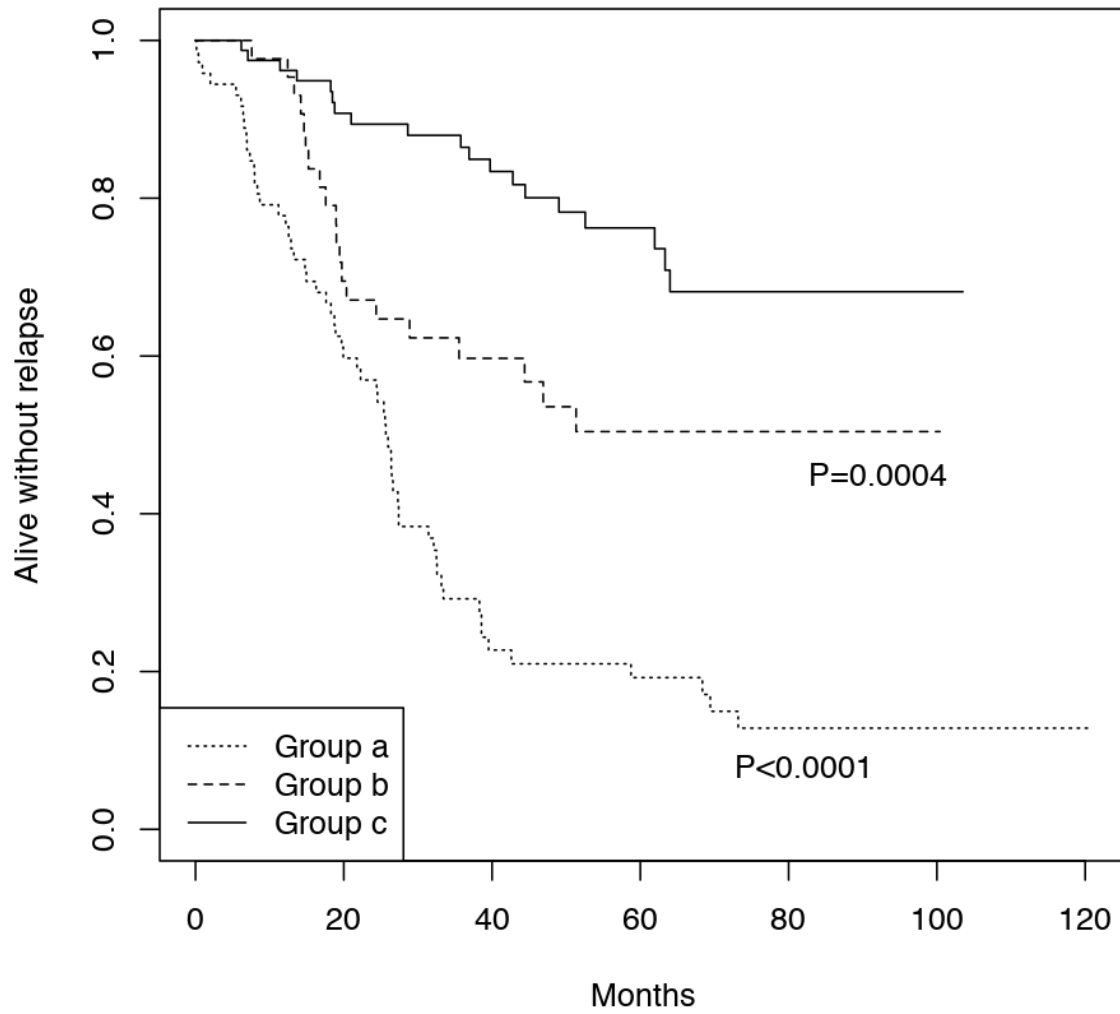

83

84

85 Figure S2

86 Hierarchical clustering with Pearson's correlation similarity and average linkage. Heatmap of  
 87 all available genes. The vertical color bars to the left show patients with RFS of less than 3  
 88 years, chromosome 3 monosomy and molecular class (all in black). The most significantly  
 89 prognostic genes in the meta-analysis are shown for chromosome 8 (twenty genes in light  
 90 green) and other chromosomes (twenty genes in blue). The horizontal color bar below the  
 91 heatmap is grey for genes that are not significantly prognostic and black for FDR<0.05.

92 It can be seen that genes *PTP4A3* and *JPH1* belong to distinct clusters, probably  
 93 corresponding to associated pathways. *BAP1* (in red) is also distinct and centered on a  
 94 narrow gene cluster.

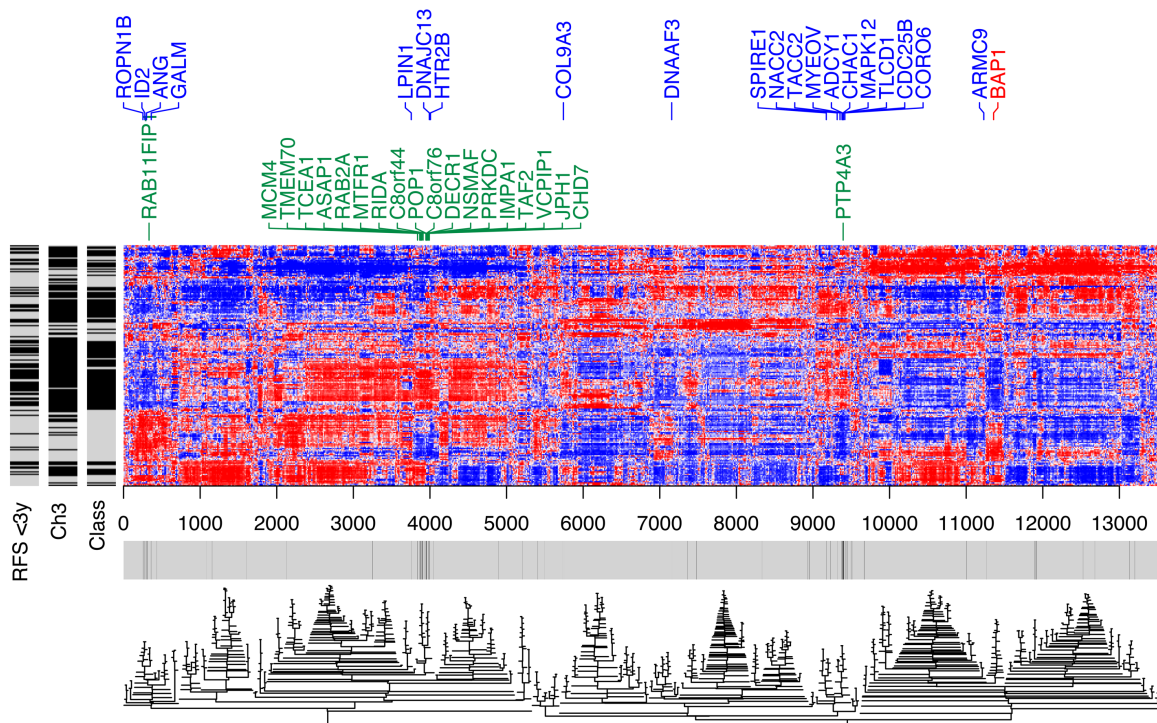

95

96

97 Figure S3

98 **Risk score and relapse-free survival in uveal melanoma (validation data).** Pooled data from  
99 GSE39717 and TCGA. The score was separated at a median cutoff for plotting.

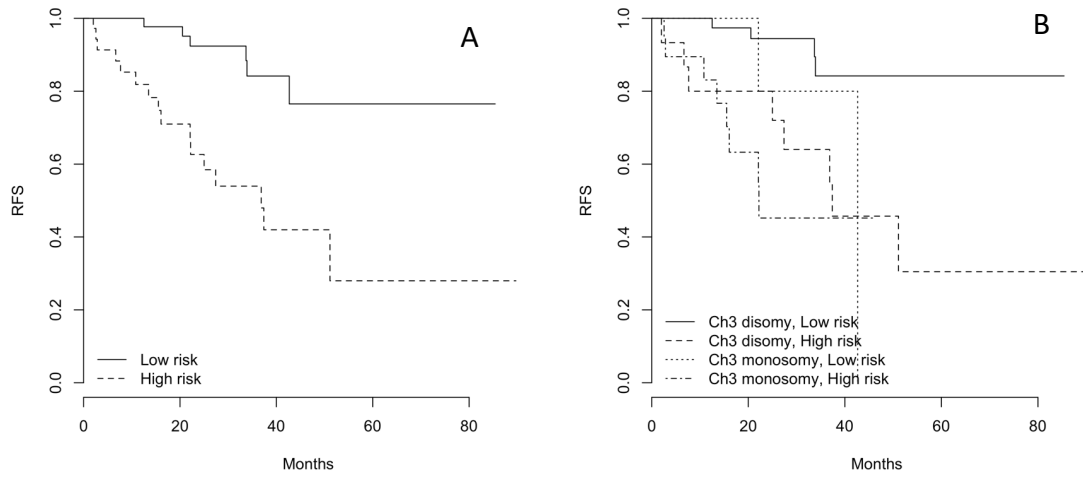

100

101 Figure S4

102 **Boxplot of the risk score in tumors from the pan-cancer dataset.** A. Comparison of tumors  
103 without liver metastasis (including non-metastatic tumors and tumors with other  
104 metastases) with tumors that presented liver metastases. B. Comparison of tumors with  
105 liver metastases with metastatic tumors that presented metastases in other sites.

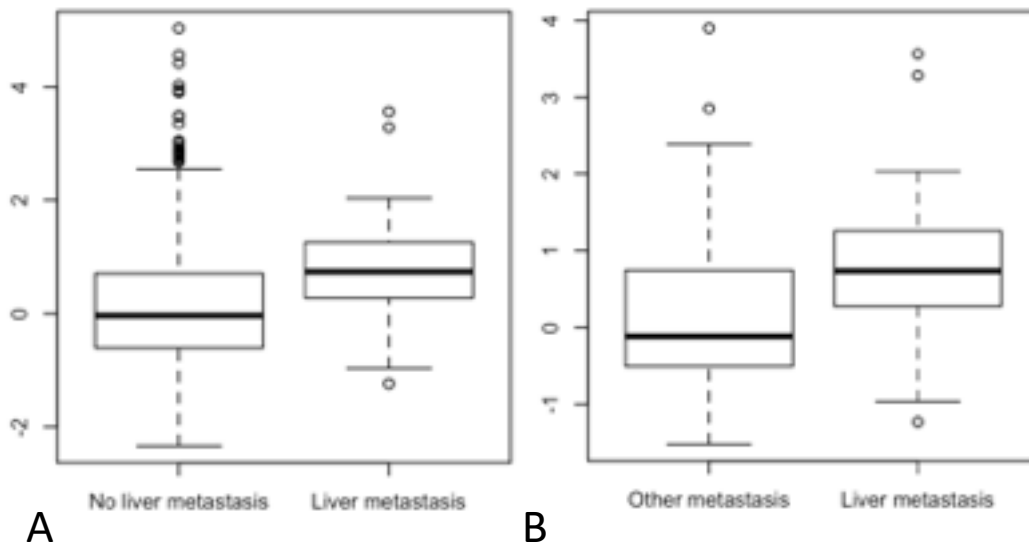

106

107

108 Figure S5

109 **Distribution of the risk score in colorectal cancer.** A bimodal distribution of the risk score is  
110 observed in both datasets (PETACC and GSE14095). Significant differences can be seen  
111 between the four CMS groups in the lower part of the figure (Wilcoxon's test, with Holm-  
112 Bonferroni P-value adjustment for multiple hypothesis testing).

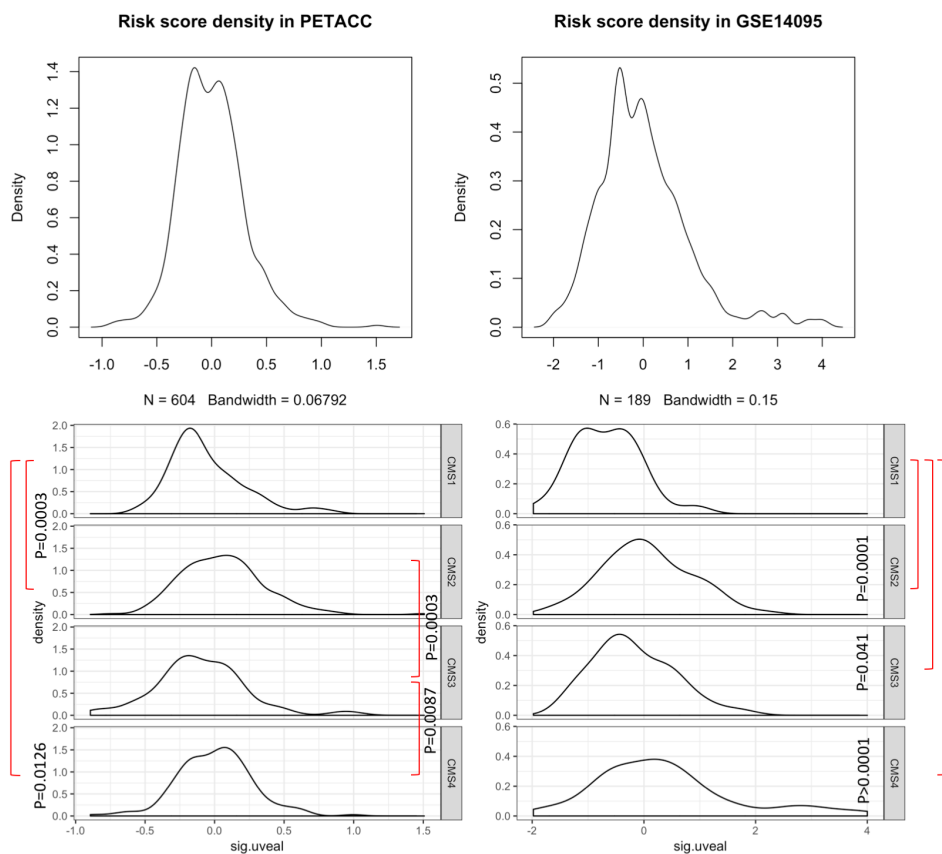

113

114



115 Figure S6

116 **Data flow chart.** A summary of the different datasets that have been used and their role in  
117 the training and validation process.

118

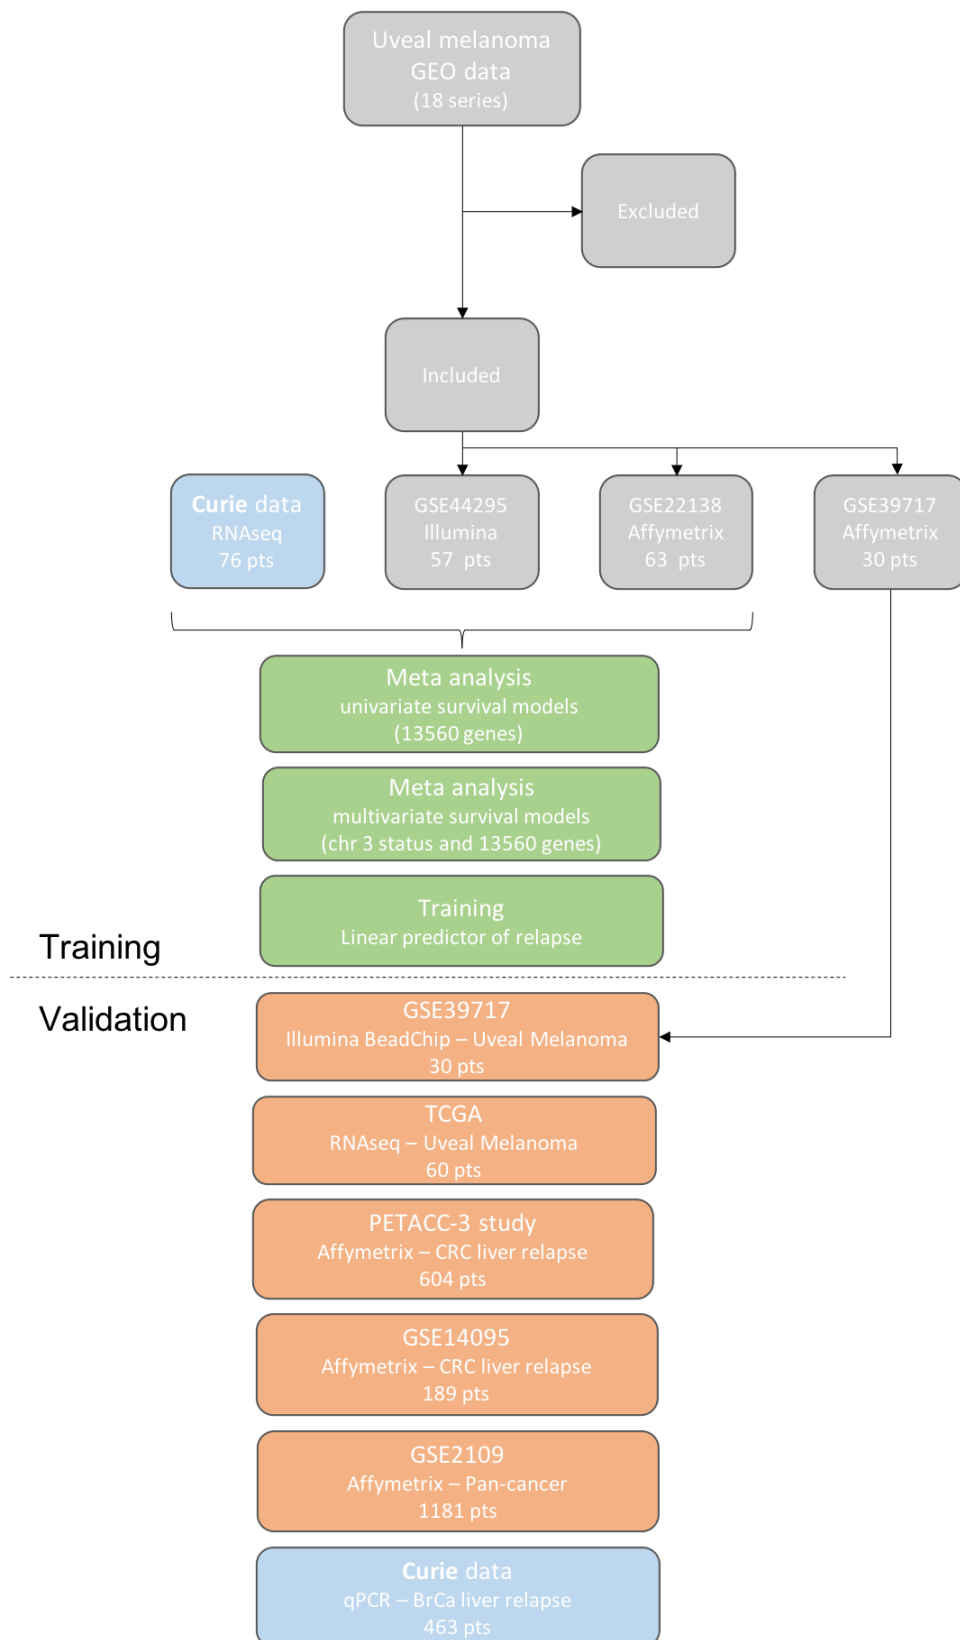

119

120 Figure S7

121 **Distribution of the molecular class gene expression.** The values visibly separate the tumors  
122 into two distinct peaks, corresponding to the two molecular classes.

123

124

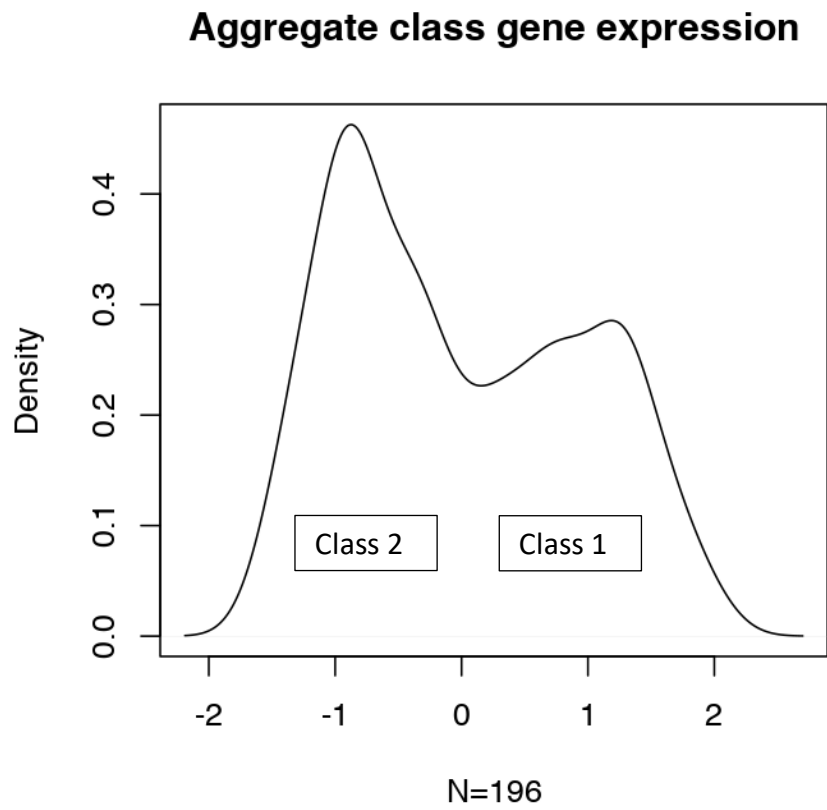

125

126 Figure S8

127 **Heatmap of genes that have been associated with Class 1 and Class 2 tumors.** The color  
128 bar to the left corresponds to predicted molecular class (red=class 1, deep blue=class 2).

129

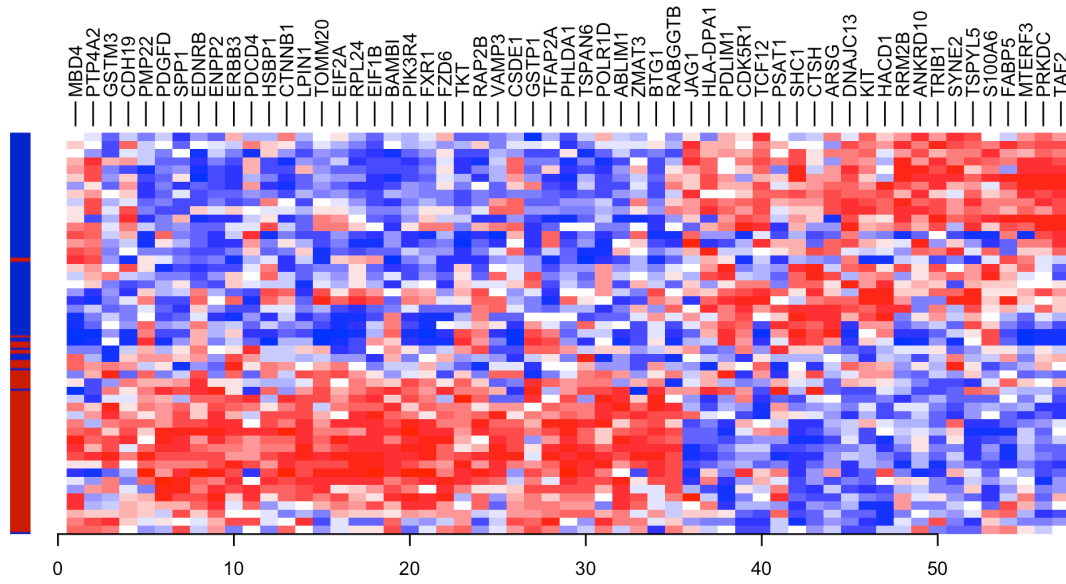

130

131
